# Supplementary material for: Pollution Characteristics, Source Apportionment, and Health Risk Assessment of Potentially Toxic Elements (PTEs) in Road Dust Samples in Jiayuguan, Hexi Corridor, China
Source: MDPI journal article supplement (doi:10.3390/toxics10100580), 2022-09-30
Supplement: s1 [file s1]

**Table S1** Detection limit and quantification limit

| Element | Limit of Detection (mg·kg <sup>-1</sup> ) | Limit of Quantitation (mg·kg <sup>-1</sup> ) |
|---------|-------------------------------------------|----------------------------------------------|
| V       | 0.7                                       | 2.8                                          |
| Cd      | 0.07                                      | 0.28                                         |
| Mn      | 0.7                                       | 2.8                                          |
| Co      | 0.02                                      | 0.07                                         |
| Ni      | 0.6                                       | 2                                            |
| Cu      | 0.5                                       | 2.0                                          |
| Zn      | 7                                         | 28                                           |
| As      | 0.6                                       | 2.4                                          |
| Se      | 0.4                                       | 1.6                                          |
| Cr      | 2                                         | 8                                            |
| Ba      | 1.1                                       | 4                                            |
| Pb      | 0.5                                       | 2                                            |

**Table S2** Background values of soil elements in Gansu Province, China

| Element | Elemental Background Values of Soil (mg·kg <sup>-1</sup> ) |
|---------|------------------------------------------------------------|
| V       | 81.9                                                       |
| Cr      | 70.2                                                       |
| Mn      | 653                                                        |
| Co      | 12.6                                                       |
| Ni      | 35.2                                                       |
| Cu      | 24.1                                                       |
| Zn      | 68.5                                                       |
| As      | 12.6                                                       |
| Se      | 0.11                                                       |
| Cd      | 0.12                                                       |
| Ba      | 446                                                        |
| Pb      | 18.8                                                       |
